# Supplementary material
Source: PubMed Central journal article supplement (PMC5970969)
Supplement: NIHMS954409-supplement-2.pdf [file NIHMS954409-supplement-2.pdf]

## Reporting Summary

Nature Research wishes to improve the reproducibility of the work that we publish. This form provides structure for consistency and transparency in reporting. For further information on Nature Research policies, see [Authors & Referees](#) and the [Editorial Policy Checklist](#).

### Statistical parameters

When statistical analyses are reported, confirm that the following items are present in the relevant location (e.g. figure legend, table legend, main text, or Methods section).

n/a Confirmed

- The exact sample size ( $n$ ) for each experimental group/condition, given as a discrete number and unit of measurement
- An indication of whether measurements were taken from distinct samples or whether the same sample was measured repeatedly
- The statistical test(s) used AND whether they are one- or two-sided  
*Only common tests should be described solely by name; describe more complex techniques in the Methods section.*
- A description of all covariates tested
- A description of any assumptions or corrections, such as tests of normality and adjustment for multiple comparisons
- A full description of the statistics including central tendency (e.g. means) or other basic estimates (e.g. regression coefficient) AND variation (e.g. standard deviation) or associated estimates of uncertainty (e.g. confidence intervals)
- For null hypothesis testing, the test statistic (e.g.  $F$ ,  $t$ ,  $r$ ) with confidence intervals, effect sizes, degrees of freedom and  $P$  value noted  
*Give  $P$  values as exact values whenever suitable.*
- For Bayesian analysis, information on the choice of priors and Markov chain Monte Carlo settings
- For hierarchical and complex designs, identification of the appropriate level for tests and full reporting of outcomes
- Estimates of effect sizes (e.g. Cohen's  $d$ , Pearson's  $r$ ), indicating how they were calculated
- Clearly defined error bars  
*State explicitly what error bars represent (e.g. SD, SE, CI)*

*Our web collection on [statistics for biologists](#) may be useful.*

### Software and code

Policy information about [availability of computer code](#)

Data collection

no software was used.

Data analysis

For ChIP-seq analysis: Bowtie (1.1.2), MACS (1.4.1).  
For RNA-seq analysis: TopHat (2.1.1), Cufflink (2.2.1), StrandNGS.  
For Motif analysis: MEME-ChIP(4.12.0).  
Statistical analysis: GraphPad Prism 5 (5.03).  
Flow cytometry analysis: Flowjo (10.4.2)

For manuscripts utilizing custom algorithms or software that are central to the research but not yet described in published literature, software must be made available to editors/reviewers upon request. We strongly encourage code deposition in a community repository (e.g. GitHub). See the Nature Research [guidelines for submitting code & software](#) for further information.

### Data

Policy information about [availability of data](#)

All manuscripts must include a [data availability statement](#). This statement should provide the following information, where applicable:

- Accession codes, unique identifiers, or web links for publicly available datasets
- A list of figures that have associated raw data
- A description of any restrictions on data availability

All sequencing data that support the findings of this study have been deposited in NCBI's GEO under accession number GSE100639. Source data for Fig. 3g, h; 4a, d, e, g, h; 5d, e, g, h, l; 6a-c and Supplementary Fig. 2b; 3a, d, f; 4c-d; 6a, b; 7a, c, d, e, g, h is provided in Supplementary Table 2. All other data supporting the findings of this study are available from the corresponding authors on reasonable request.

## Field-specific reporting

Please select the best fit for your research. If you are not sure, read the appropriate sections before making your selection.

Life sciences  Behavioural & social sciences

For a reference copy of the document with all sections, see [nature.com/authors/policies/ReportingSummary-flat.pdf](https://www.nature.com/authors/policies/ReportingSummary-flat.pdf)

## Life sciences

### Study design

All studies must disclose on these points even when the disclosure is negative.

|                 |                                                                                                                                                                                                                                                                                                                                                                                                                                                                                                                                                                              |
|-----------------|------------------------------------------------------------------------------------------------------------------------------------------------------------------------------------------------------------------------------------------------------------------------------------------------------------------------------------------------------------------------------------------------------------------------------------------------------------------------------------------------------------------------------------------------------------------------------|
| Sample size     | No statistical was used to predetermine sample size. The sample size was determined based on the previous publications and experimental designs that have similar objectives( Ramathal et al., Cell Rep., 2014; Ramathal et al., Sci. Rep., 2015; Durruthy et al., Hum. Mol. Genet., 2014; Kee et al., Nature, 2009). Three to more independent results were used to perform statistical analyses. If less, no statistics were performed from these samples. All source data required for statistical tests are indicated in Supplementary Table 2 (Statistics data source). |
| Data exclusions | Data were excluded when negative or positive controls were not working.                                                                                                                                                                                                                                                                                                                                                                                                                                                                                                      |
| Replication     | For each experiment, we performed at least two independent biological replicates and all attempts were successful.                                                                                                                                                                                                                                                                                                                                                                                                                                                           |
| Randomization   | For the xenotransplantation studies, animals were randomly allocated into groups receiving various cell line injections. Randomization (formal or otherwise) was not relevant for other data included in the manuscript.                                                                                                                                                                                                                                                                                                                                                     |
| Blinding        | Investigators were not blinded to group allocation. For the counting analysis for xenotransplantation, investigators were blinded to the samples.                                                                                                                                                                                                                                                                                                                                                                                                                            |

## Materials & experimental systems

Policy information about [availability of materials](#)

| n/a                                 | Involved in the study                                           |
|-------------------------------------|-----------------------------------------------------------------|
| <input checked="" type="checkbox"/> | <input type="checkbox"/> Unique materials                       |
| <input type="checkbox"/>            | <input checked="" type="checkbox"/> Antibodies                  |
| <input type="checkbox"/>            | <input checked="" type="checkbox"/> Eukaryotic cell lines       |
| <input type="checkbox"/>            | <input checked="" type="checkbox"/> Research animals            |
| <input type="checkbox"/>            | <input checked="" type="checkbox"/> Human research participants |

### Antibodies

Antibodies used

anti-OCT4 (sc-8628, Santa Cruz Biotechnology, Lot#: C2613);  
 anti-PAX5 (sc-1974, Santa Cruz Biotechnology, Lot#: A3113);  
 anti-PRDM1 (C14A4, Cell Signaling Technology, Lot:4);  
 anti-DDX4 (R&D #AF2030, Lot: KPX0 4051);  
 anti-GFP (Abcam; ab18373, Lot: GR254056-13);  
 anti-DAZL (Novus; NB100-2437; Lot: P1);  
 anti-CKIT (A4502; DAKO);  
 anti-beta-ACTIN (8H10D10, Cell Signaling Technology, Lot:15)  
 HRP-conjugated anti-rabbit IgG secondary antibody, Supplier: Santa Cruz Biotechnology, Cat.: sc-2004, Lot: H0913.  
 HRP-conjugated anti-goat IgG secondary antibody, Supplier: Santa Cruz Biotechnology, Cat.: sc-2020, Lot: B0613.  
 HRP-conjugated anti-mouse IgG secondary antibody, Supplier: Santa Cruz Biotechnology, Cat.: sc-2005.

Alexa Fluor® 488 AffiniPure Donkey Anti-Goat IgG (H+L), Jackson ImmunoResearch Laboratories, Code: 705-545-003  
 Alexa Fluor® 594 AffiniPure Donkey Anti-Rabbit IgG (H+L), Jackson ImmunoResearch Laboratories, Code: 711-585-152.  
 The commercial antibodies were validated based on the information on the manufacturers' instructions.  
 For ChIP and Co-IP assay, antibodies were used at 1:100.  
 For immunostaining, primary antibodies were used at 1:200 and secondary antibodies were used at 1:300.  
 For western blot, primary antibodies were used at 1:1000 and secondary antibodies were used at 1:5000.  
 anti-OCT4 (sc-8628, Santa Cruz Biotechnology, Lot#: C2613);  
 anti-PAX5 (sc-1974, Santa Cruz Biotechnology, Lot#: A3113);  
 anti-PRDM1 (C14A4, Cell Signaling Technology, Lot:4);  
 anti-DDX4 (R&D #AF2030, Lot: KPX0 4051);  
 anti-GFP (Abcam; ab18373, Lot: GR254056-13);  
 anti-DAZL (Novus; NB100-2437; Lot: P1);  
 anti-CKIT (A4502; DAKO);  
 anti-beta-ACTIN (8H10D10, Cell Signaling Technology, Lot:15)  
 HRP-conjugated anti-rabbit IgG secondary antibody, Supplier: Santa Cruz Biotechnology, Cat.: sc-2004, Lot: H0913.  
 HRP-conjugated anti-goat IgG secondary antibody, Supplier: Santa Cruz Biotechnology, Cat.: sc-2020, Lot: B0613.  
 HRP-conjugated anti-mouse IgG secondary antibody, Supplier: Santa Cruz Biotechnology, Cat.: sc-2005.  
 Alexa Fluor® 488 AffiniPure Donkey Anti-Goat IgG (H+L), Jackson ImmunoResearch Laboratories, Code: 705-545-003  
 Alexa Fluor® 594 AffiniPure Donkey Anti-Rabbit IgG (H+L), Jackson ImmunoResearch Laboratories, Code: 711-585-152.  
 For ChIP and Co-IP assay, antibodies were used at 1:100.  
 For immunostaining, primary antibodies were used at 1:200 and secondary antibodies were used at 1:300.  
 For western blot, primary antibodies were used at 1:1000 and secondary antibodies were used at 1:5000.

## Validation

The commercial antibodies were validated based on the information on the manufacturers' instructions.

## Eukaryotic cell lines

Policy information about [cell lines](#)

## Cell line source(s)

H1 hESCs (WiCell) (feeder free)  
 293T (ATCC)

## Authentication

Immunostaining of cell type specific markers was performed for cell line authentication.

## Mycoplasma contamination

All lines were tested negative for mycoplasma contamination.

Commonly misidentified lines  
(See [ICLAC](#) register)

No commonly misidentified cell lines were used

## Research animals

Policy information about [studies involving animals](#); [ARRIVE guidelines](#) recommended for reporting animal research

## Animals/animal-derived materials

In this study, we used busulfan-treated, immune-deficient nude male mice (NCr nu/nu; Taconic). Mice are treated with busulfan (40 mg/kg) at 5-6 weeks of age and then transplanted 5-12 weeks post busulfan.

## Human research participants

Policy information about [studies involving human research participants](#)

## Population characteristics

In this study, we obtained second trimester human fetal testis tissue. Note that the protocol for tissue procurement and use was approved by the Institutional Review Board of Montana State University (RR-P031014-EX); all procedures were compliant with all relevant ethical regulations regarding human research with unidentifiable banked tissue.

## Method-specific reporting

n/a | Involved in the study

- ChIP-seq  
  Flow cytometry  
  Magnetic resonance imaging

## ChIP-seq

## Data deposition

- Confirm that both raw and final processed data have been deposited in a public database such as [GEO](#).  
 Confirm that you have deposited or provided access to graph files (e.g. BED files) for the called peaks.

|                                                                    |                                                                                                                                                                                                                                                                                                                                                                                                                                                                                                                                                                                                                                                                                                                                                                            |
|--------------------------------------------------------------------|----------------------------------------------------------------------------------------------------------------------------------------------------------------------------------------------------------------------------------------------------------------------------------------------------------------------------------------------------------------------------------------------------------------------------------------------------------------------------------------------------------------------------------------------------------------------------------------------------------------------------------------------------------------------------------------------------------------------------------------------------------------------------|
| Data access links<br><i>May remain private before publication.</i> | <a href="https://www.ncbi.nlm.nih.gov/geo/submission/update/?acc=GSE100639">https://www.ncbi.nlm.nih.gov/geo/submission/update/?acc=GSE100639</a>                                                                                                                                                                                                                                                                                                                                                                                                                                                                                                                                                                                                                          |
| Files in database submission                                       | 1M_H9_OCT4_ChIP_CGATGT-04-30-2013.fastq<br>2nd_OCT4_SC_GCCAAT-04-30-2013.fastq<br>2nd_Test_OCT4_Ab_ACAGTG-04-30-2013.fastq<br>IM_Mix_OCT4_TGACCA-04-30-2013.fastq<br>testes_prdm1_chip-11-26-2013.fastq<br>PAX5-testis-130909_BRISCOE_0116_BD2CRUACXX_L6_CTTGTA_pf.fastq.gz<br>input-11-26-2013.fastq<br>1M_H9_OCT4.sorted.dedup.bam<br>2nd_OCT4_SC.sorted.dedup.bam<br>2nd_Test_OCT4_Ab.sorted.dedup.bam<br>IM_Mix_OCT4.sorted.dedup.bam<br>PAX5_TESTES_BRISCOE_0116_BD2CRUACXX_L6_CTTGTA_pf.bam<br>TESTES_PRDM1.bowtie2.srt.bam                                                                                                                                                                                                                                          |
| Genome browser session<br>(e.g. <a href="#">UCSC</a> )             | no longer applicable                                                                                                                                                                                                                                                                                                                                                                                                                                                                                                                                                                                                                                                                                                                                                       |
| <b>Methodology</b>                                                 |                                                                                                                                                                                                                                                                                                                                                                                                                                                                                                                                                                                                                                                                                                                                                                            |
| Replicates                                                         | We did two replicates for OCT4 ChIP in human fetal testis, for the other ChIP, we only provided one                                                                                                                                                                                                                                                                                                                                                                                                                                                                                                                                                                                                                                                                        |
| Sequencing depth                                                   | single-end, 36bp                                                                                                                                                                                                                                                                                                                                                                                                                                                                                                                                                                                                                                                                                                                                                           |
| Antibodies                                                         | anti-OCT4 (sc-8628, Santa Cruz Biotechnology);<br>anti-PAX5 (sc-1974, Santa Cruz Biotechnology);<br>anti-PRDM1 (C14A4, Cell Signaling Technology);                                                                                                                                                                                                                                                                                                                                                                                                                                                                                                                                                                                                                         |
| Peak calling parameters                                            | Effective genome size 2700000000.0<br>Tag size 49<br>Band width 300<br>Pvalue cutoff for peak detection 1e-05<br>Select the regions with MFOLD high-confidence enrichment ratio against background to build model 32<br>Parse xls files into into distinct interval files False<br>Save shifted raw tag count at every bp into a wiggle file wig<br>Extend tag from its middle point to a wigextend size fragment. -1<br>Resolution for saving wiggle files 10<br>Use fixed background lambda as local lambda for every peak region False<br>3 levels of regions around the peak region to calculate the maximum lambda as local lambda 1000,5000,10000<br>Build Model create_model<br>Diagnosis report no_diag<br>Perform the new peak detection method (futurefdr) False |
| Data quality                                                       | OCT4 ChIP in human fetal testis: 27061<br>PAX5 ChIP in human fetal testis: 22728<br>PRDM1 ChIP in human fetal testis: 48399<br>OCT4 ChIP in hESCs:14799                                                                                                                                                                                                                                                                                                                                                                                                                                                                                                                                                                                                                    |
| Software                                                           | Aligment by Bowtie-illumina/Galaxy<br>Peak call by MACS-ChIP-seq/Galaxy<br>BiwWig generated by WigtoBigWig/Galaxy<br>Motif detection by MEMECHIP                                                                                                                                                                                                                                                                                                                                                                                                                                                                                                                                                                                                                           |

## Flow Cytometry

### Plots

Confirm that:

- The axis labels state the marker and fluorochrome used (e.g. CD4-FITC).
- The axis scales are clearly visible. Include numbers along axes only for bottom left plot of group (a 'group' is an analysis of identical markers).
- All plots are contour plots with outliers or pseudocolor plots.
- A numerical value for number of cells or percentage (with statistics) is provided.

### Methodology

|                    |                                                                                                                                                                                                                                                      |
|--------------------|------------------------------------------------------------------------------------------------------------------------------------------------------------------------------------------------------------------------------------------------------|
| Sample preparation | hESCs were dissociated in 0.25% trypsin--EDTA (Gibco BRL) at 37°C for 5 min and collected by centrifugation at 200g in an Eppendorf 5702 R centrifuge. Then the cells were passed through the 70uM strainers (BD Biosciences) to make sure they were |
|--------------------|------------------------------------------------------------------------------------------------------------------------------------------------------------------------------------------------------------------------------------------------------|

digested as single cells before they were subject to the flow cytometry.  
Mouse testis cells were dissociated with 0.25% Trypsin-EDTA for 5 min at 37°C. Dissociated cells were passed through the 40µm strainers (BD Biosciences) and then incubated in 1% BSA in PBS containing primary antibodies on ice for 20min.

Instrument

BD FACSAria 2.0

Software

For data collection: BD FACSDiva v 6.1.2 software;  
For data analysis: Flowjo (10.4.2)

Cell population abundance

Sorted cells were directly placed into DNA extraction buffer. The abundance for these samples could not be assessed.

Gating strategy

After cells were selected in the FSC/SSC dot plot to remove debris, they were gated to exclude cellular aggregates in the FSC/FSC dot plot. Gates of GFP-FITC, mOrange-PE, or CKIT-PE cells were set and compared with a control sample with no detectable fluorochrome expression.

Tick this box to confirm that a figure exemplifying the gating strategy is provided in the Supplementary Information.
